# Supplementary material for: Hybrid ecosystems can contribute to local biodiversity conservation
Source: Springer Nature journal article supplement (doi:10.1007/s10531-016-1218-3), 2016-10-17
Supplement: MOESM2 [file 10888228]

## Sheet: Online Resource 2
Hybrid ecosystems can contribute to local biodiversity conservation
Biodiversity and Conservation
Liis Kasari*, Liina Saar, Francesco de Bello, Krista Takkis, Aveliina Helm
* Corresponding author. Department of Botany, Institute of Ecology and Earth Sciences, University of Tartu, Lai 40, 51005 Tartu, Estonia. E-mail: liis.kasari@ut.ee.
Online Resource 2 Information about current and historical species presence/absence in eight studied grasslands; species specification being either charactheristic (i.e. species that are typical to a given community and belong to its historically developed habitat-specific species pool) or derived ( i.e. species that have not been historically characteristic to a given habitat, but have newly col…
	Current species presence/absence per site								Historical species presence/absence per site
Species name	Site 1	Site 2	Site 3	Site 4	Site 5	Site 6	Site 7	Site 8	Site 1	Site 2	Site 3	Site 4	Site 5	Site 6	Site 7	Site 8	Characteristic/derived species	Species group
Achillea millefolium L.	1	1	1	1	1	1	1	1	1	1	1	1	1	1	1	1	Characteristic	Stable
Aegopodium podagraria L.	1	1	1	0	0	0	0	1	0	0	0	0	1	0	0	0	Derived	Increased occurence
Agrimonia eupatoria L.	1	0	0	0	0	0	1	0	0	0	0	0	1	0	0	0	Characteristic	Stable
Agrostis canina L.	0	1	0	0	1	0	0	0	1	0	0	0	0	0	1	0	Derived	Stable
Agrostis capillaris L.	1	0	1	1	1	0	0	1	1	1	0	0	0	0	0	0	Characteristic	Increased occurence
Agrostis gigantea Roth	1	0	1	0	0	0	0	0	0	0	0	0	0	0	0	0	Derived	New
Agrostis stolonifera L.	1	0	1	1	1	1	1	1	1	1	1	1	1	1	1	1	Characteristic	Stable
Agrostis vinealis Schreb.	0	0	0	0	0	0	1	0	0	0	0	0	0	0	0	0	Characteristic	New
Allium oleraceum L.	1	0	1	0	0	0	0	0	0	0	0	0	0	0	0	0	Characteristic	New
Allium schoenoprasum L.	1	1	1	0	1	1	0	1	0	0	0	0	1	0	0	0	Characteristic	Increased occurence
Alopecurus pratensis L.	0	0	1	0	1	0	0	0	0	0	0	0	0	0	0	0	Derived	New
Anchusa officinalis L.	0	1	0	0	0	0	0	0	0	1	1	0	0	0	0	0	Derived	Stable
Androsace septentrionalis L.	1	1	0	1	1	0	0	0	1	1	1	0	1	0	0	0	Characteristic	Stable
Anemone nemorosa L.	0	0	0	0	0	0	0	0	1	0	0	0	0	0	0	0	Derived	Locally extinct
Anemone sylvestris L.	1	1	0	0	1	1	1	1	1	1	1	0	0	1	1	1	Characteristic	Stable
Angelica sylvestris L.	0	0	0	0	1	0	1	0	0	0	0	0	0	0	0	0	Derived	New
Antennaria dioica (L.) Gaertn.	1	0	0	0	0	0	0	0	1	1	1	1	1	1	1	1	Characteristic	Decreased occurence
Anthoxanthum odoratum L.	0	1	0	0	1	0	1	0	0	0	0	1	0	0	0	0	Derived	Increased occurence
Anthriscus sylvestris (L.) Hoffm.	1	0	1	1	1	1	1	1	1	0	1	0	0	0	0	1	Derived	Increased occurence
Anthyllis vulneraria L.	1	1	1	0	1	1	1	1	1	1	1	1	1	0	1	1	Characteristic	Stable
Arabidopsis arenosa (L.) Lawalrée	0	0	0	0	0	0	0	0	1	1	1	0	1	0	0	0	Derived	Locally extinct
Arabidopsis thaliana (L.) Heynh.	1	0	0	1	0	0	0	0	0	0	0	0	0	0	0	0	Derived	New
Arabis hirsuta (L.) Scop.	1	1	1	1	1	1	1	1	1	0	0	0	1	0	1	0	Characteristic	Increased occurence
Arctium tomentosum Mill.	0	0	1	0	1	0	0	0	0	0	0	0	0	0	0	0	Derived	New
Arenaria serpyllifolia L.	1	1	1	1	1	1	1	1	1	1	1	1	1	1	1	1	Characteristic	Stable
Armeria maritima ssp. elongata (Hoffm.) Blytt	0	1	0	0	0	0	0	0	0	0	0	0	0	0	0	0	Derived	New
Arrhenatherum elatius (L.) P.Beauv. ex J.Presl & C.Presl.	0	1	1	0	0	0	0	0	0	0	0	0	0	0	0	0	Derived	New
Artemisia campestris L.	1	1	1	1	1	1	0	1	1	1	1	1	1	0	1	1	Characteristic	Stable
Artemisia vulgaris L.	1	1	1	1	1	1	0	1	0	1	1	0	0	0	0	1	Derived	Increased occurence
Asperula tinctoria L.	1	1	0	0	1	1	1	1	1	1	1	0	0	0	0	0	Characteristic	Increased occurence
Barbarea vulgaris R.Br.	0	1	1	1	1	1	1	1	1	1	1	0	1	0	0	1	Derived	Increased occurence
Berteroa incana (L.) DC.	1	1	1	1	0	0	0	1	0	0	0	0	0	0	0	0	Characteristic	New
Bidens tripartita L.	0	0	0	0	0	0	0	0	0	0	0	0	1	0	0	0	Derived	Locally extinct
Borago officinalis L.	0	0	1	0	0	0	0	0	0	0	0	0	0	0	0	0	Derived	New
Botrychium lunaria (L.) Sw.	0	0	0	0	0	0	0	0	1	0	0	1	0	0	1	1	Derived	Locally extinct
Brassica nigra (L.) K.Koch	0	0	0	0	0	0	0	0	0	0	0	0	1	0	0	0	Derived	Locally extinct
Brassica rapa L.	0	0	0	1	0	0	0	0	0	0	0	0	0	0	0	0	Derived	New
Briza media L.	1	1	0	0	1	1	1	1	1	1	0	0	0	1	1	0	Characteristic	Increased occurence
Bromus hordeaceus L.	0	1	1	1	1	0	0	0	1	1	1	0	0	0	0	1	Characteristic	Stable
Bromus inermis Leyss.	0	1	1	0	0	0	0	0	0	0	0	0	0	0	0	0	Derived	New
Bunias orientalis L.	1	1	1	1	1	1	0	1	0	1	0	0	0	1	0	0	Derived	Increased occurence
Calamagrostis epigeios (L.) Roth	1	1	1	0	0	1	0	1	0	0	0	0	0	0	0	0	Derived	New
Calluna vulgaris (L.) Hull	0	0	0	0	0	0	0	0	0	1	0	0	0	1	1	1	Derived	Locally extinct
Calystegia sepium (L.) R.Br.	0	1	1	0	0	0	0	0	0	0	0	0	0	0	0	0	Derived	New
Campanula glomerata L.	1	1	1	1	1	1	1	1	1	0	0	0	1	1	1	1	Derived	Increased occurence
Campanula latifolia L.	0	0	1	1	0	0	0	1	0	0	0	0	0	0	0	0	Derived	New
Campanula patula L.	0	0	1	1	1	0	1	1	1	0	0	0	0	0	0	0	Derived	Increased occurence
Campanula persicifolia L.	1	1	0	1	1	0	1	1	1	0	0	0	0	0	0	0	Characteristic	Increased occurence
Campanula rapunculoides L.	1	0	0	0	0	0	0	0	1	0	0	0	0	0	0	0	Derived	Stable
Campanula rotundifolia L.	1	1	0	1	1	1	1	1	1	1	1	1	1	1	1	1	Characteristic	Stable
Campanula trachelium L.	0	0	0	1	0	0	0	0	1	0	0	0	0	0	0	0	Derived	Stable
Capsella bursa-pastoris (L.) Medik.	1	0	1	1	1	0	1	1	1	0	1	0	0	0	0	0	Derived	Increased occurence
Cardamine pratensis L.	0	0	0	0	0	0	0	0	0	0	0	0	1	0	0	0	Derived	Locally extinct
Carduus crispus Guirćo ex Nyman	0	0	1	0	0	1	0	0	0	0	0	0	0	0	0	0	Derived	New
Carex canescens L.	0	0	0	0	0	0	0	0	0	0	0	0	1	0	0	0	Derived	Locally extinct
Carex caryophyllea Latourr.	0	0	1	0	0	0	0	0	1	1	1	1	1	1	1	1	Characteristic	Decreased occurence
Carex ericetorum Pollich	0	0	0	0	0	0	0	0	0	0	0	1	0	0	0	0	Characteristic	Locally extinct
Carex hirta L.	0	0	1	0	0	1	0	0	0	0	0	0	0	0	0	0	Characteristic	New
Carex lasiocarpa Ehrh.	0	0	1	0	0	0	0	0	0	0	0	0	0	1	0	0	Derived	Stable
Carex muricata L.	0	1	1	0	0	0	0	0	0	0	0	0	0	0	0	0	Derived	New
Carex nigra (L.) Reichard	0	0	0	0	1	1	1	0	0	0	0	0	1	0	1	0	Derived	Stable
Carex panicea L.	0	0	0	0	0	0	0	0	0	0	0	1	1	0	1	0	Characteristic	Locally extinct
Carex spicata Huds.	1	1	1	0	1	1	1	1	1	1	0	1	0	0	0	1	Characteristic	Increased occurence
Carum carvi L.	0	0	1	0	1	0	0	1	0	0	0	0	1	0	0	0	Derived	Increased occurence
Centaurea jacea L.	1	1	1	0	1	1	1	1	1	1	0	0	0	1	1	1	Characteristic	Increased occurence
Centaurea scabiosa L.	1	0	1	1	0	0	0	1	1	0	0	0	0	0	1	0	Derived	Increased occurence
Cerastium alpinum L.	0	0	0	0	0	0	0	0	0	0	1	0	0	0	0	0	Characteristic	Locally extinct
Cerastium arvense L.	1	1	1	1	1	0	0	0	0	0	0	0	0	0	0	0	Derived	New
Cerastium fontanum Baumg.	1	1	1	1	1	1	1	1	1	1	1	1	1	1	1	1	Characteristic	Stable
Chelidonium majus L.	1	1	1	0	0	0	0	0	1	1	1	0	0	0	0	0	Derived	Stable
Chenopodium album L.	0	1	0	1	1	1	0	0	0	0	0	0	0	0	0	0	Derived	New
Cirsium acaule (L.) A.A.Weber ex Wigg.	1	0	0	0	0	0	1	1	1	1	1	0	0	1	1	1	Characteristic	Decreased occurence
Cirsium arvense (L.) Scop.	1	1	1	1	1	1	0	1	0	0	0	0	0	0	0	0	Derived	New
Cirsium helenioides (L.) Hill	0	0	0	1	1	0	1	0	0	0	0	0	0	0	0	0	Derived	New
Cirsium vulgare (Savi) Ten.	1	0	1	1	0	1	0	1	1	0	1	0	0	0	1	1	Derived	Stable
Clinopodium acinos (L.) Kuntze	1	1	1	1	1	1	0	1	1	1	1	1	1	1	1	1	Characteristic	Stable
Clinopodium vulgare L.	0	0	0	0	0	0	0	0	0	0	0	0	0	1	0	0	Derived	Locally extinct
Convallaria majalis L.	1	0	0	0	0	0	1	0	0	0	0	0	0	0	0	0	Derived	New
Convolvulus arvensis L.	0	1	1	1	0	0	0	0	0	0	0	0	0	0	0	0	Derived	New
Corydalis solida (L.) Clairv.	0	0	0	0	1	0	0	0	0	0	0	0	0	0	0	0	Derived	New
Cota tinctoria (L.) J.Gay ex Guss.	0	1	0	1	0	1	0	1	0	1	1	0	0	0	0	1	Characteristic	Stable
Crepis praemorsa (L.) Turcz.	1	0	0	0	0	0	1	0	1	0	0	0	0	0	0	0	Derived	Stable
Crepis tectorum L.	1	1	1	0	1	0	0	0	0	0	0	0	1	0	0	1	Characteristic	Increased occurence
Cystopteris fragilis (L.) Bernh.	0	0	0	0	1	0	0	0	0	0	0	0	1	0	1	0	Derived	Stable
Dactylis glomerata L.	1	1	1	0	1	1	1	1	1	1	0	1	0	0	1	1	Characteristic	Increased occurence
Deschampsia cespitosa (L.) P.Beauv.	1	0	1	0	1	1	1	1	1	1	1	0	1	1	0	1	Characteristic	Stable
Descurainia sophia (L.) Webb ex Prantl	0	0	1	0	0	1	0	0	0	0	0	0	0	0	0	0	Derived	New
Dianthus deltoides L.	0	0	0	1	1	1	1	1	0	0	0	0	0	1	0	0	Characteristic	Increased occurence
Dianthus superbus L.	0	0	0	0	1	0	0	0	0	0	0	0	1	1	0	1	Derived	Decreased occurence
Diplotaxis tenuifolia (L.) DC.	0	0	1	0	0	0	0	0	0	0	0	0	0	0	0	0	Derived	New
Draba incana L.	0	0	0	0	0	0	0	0	0	0	1	0	0	0	0	0	Characteristic	Locally extinct
Echium vulgare L.	1	1	1	1	0	1	0	1	1	0	1	0	0	0	0	0	Characteristic	Increased occurence
Elymus caninus (L.) L.	0	0	0	0	0	0	0	0	0	0	0	0	1	0	0	0	Derived	Locally extinct
Elymus repens (L.) Gould	0	1	1	1	1	1	0	1	0	1	0	0	0	0	0	0	Derived	Increased occurence
Epilobium angustifolium L.	1	1	1	1	1	0	0	1	0	1	0	0	0	0	0	0	Derived	Increased occurence
Epilobium montanum L.	1	0	0	0	0	1	0	0	1	1	0	0	0	0	0	1	Derived	Stable
Equisetum arvense L.	0	1	1	0	1	0	1	1	0	0	0	0	0	0	0	0	Derived	New
Equisetum pratense Ehrh.	0	0	0	1	0	0	1	0	0	0	0	0	0	0	0	0	Derived	New
Erigeron acer L.	0	1	1	1	0	0	0	1	0	1	0	0	0	0	0	1	Derived	Increased occurence
Erodium cicutarium (L.) L'Hér.	0	0	1	1	0	0	0	0	0	0	0	0	0	0	0	0	Derived	New
Erophila verna (L.) DC.	0	1	0	0	0	0	1	0	1	0	0	0	1	0	0	0	Characteristic	Stable
Erucastrum gallicum (Willd.) O.E.Schulz	0	0	1	0	0	1	0	0	0	0	0	0	0	0	0	0	Derived	New
Erysimum cheiranthoides L.	0	0	0	1	1	0	0	0	0	0	0	0	1	0	0	0	Derived	Stable
Erysimum virgatum Roth	0	1	1	0	0	0	0	1	0	1	1	0	0	0	0	0	Derived	Stable
Euphorbia cyparissias L.	0	1	0	0	0	0	0	0	0	0	0	0	0	0	0	0	Derived	New
Euphorbia esula L.	0	1	1	0	0	0	0	1	0	0	0	0	0	0	0	0	Derived	New
Euphorbia palustris L.	1	0	0	1	0	0	0	0	0	0	0	0	0	0	0	0	Derived	New
Fallopia convolvulus (L.) Į.Löve	0	0	0	0	0	0	0	0	0	0	0	0	1	0	0	0	Derived	Locally extinct
Festuca arundinacea Schreb.	0	0	1	0	0	1	0	1	1	1	0	0	0	0	0	0	Derived	Stable
Festuca gigantea (L.) Vill.	0	0	1	0	0	0	0	0	0	0	0	0	0	0	0	0	Derived	New
Festuca ovina L.	1	1	0	0	1	1	1	1	1	1	1	1	1	1	1	1	Characteristic	Decreased occurence
Festuca pratensis Huds.	1	1	1	1	1	1	1	1	1	1	1	0	0	1	1	1	Derived	Increased occurence
Festuca rubra L.	1	1	1	1	1	1	1	1	1	1	1	1	1	1	1	1	Characteristic	Stable
Filipendula ulmaria (L.) Maxim.	1	0	0	0	1	1	1	1	0	0	0	0	1	0	1	0	Derived	Increased occurence
Filipendula vulgaris Moench	1	1	1	1	1	1	1	1	1	1	1	1	1	1	1	1	Characteristic	Stable
Fragaria vesca L.	1	1	0	1	1	1	1	1	1	1	1	1	1	1	1	1	Characteristic	Stable
Fragaria viridis Weston	1	1	1	1	1	1	1	1	1	0	1	0	0	1	1	0	Characteristic	Increased occurence
Fumaria officinalis L.	0	0	0	1	0	0	1	0	0	0	0	0	0	0	0	0	Derived	New
Galega orientalis Lam.	0	1	1	0	0	0	0	0	0	0	0	0	0	0	0	0	Derived	New
Galeopsis ladanum L.	0	0	0	0	0	0	0	0	0	0	1	0	0	0	0	0	Derived	Locally extinct
Galium album Mill.	1	1	1	1	0	1	1	1	1	0	0	0	0	0	0	0	Characteristic	Increased occurence
Galium aparine L.	0	0	1	0	0	0	0	0	0	0	0	0	0	0	0	0	Derived	New
Galium boreale L.	1	1	1	1	1	1	1	1	1	1	1	0	1	1	1	1	Characteristic	Stable
Galium mollugo L.	1	0	0	0	0	0	0	0	1	0	0	0	0	0	1	0	Characteristic	Stable
Galium palustre L.	0	0	0	0	0	1	0	0	0	0	0	0	0	0	0	0	Derived	New
Galium uliginosum L.	0	0	0	0	0	0	0	0	1	0	0	0	1	0	1	0	Derived	Locally extinct
Galium verum L.	1	1	1	1	1	1	1	1	1	1	1	1	1	1	1	1	Characteristic	Stable
Gentiana cruciata L.	1	0	1	0	0	0	0	0	1	0	0	0	0	0	0	0	Derived	Stable
Gentianella amarella (L.) Harry Sm.	0	0	0	0	0	0	0	0	1	0	0	0	1	1	1	1	Characteristic	Locally extinct
Geranium palustre L.	0	0	1	0	1	0	1	1	0	0	0	0	0	0	0	0	Derived	New
Geranium pratense L.	0	0	1	0	0	1	0	1	0	0	1	1	0	0	0	1	Derived	Stable
Geranium pusillum L.	0	0	0	1	0	0	0	0	0	0	0	0	0	0	0	0	Characteristic	New
Geranium robertianum L.	0	1	1	0	0	0	0	0	0	0	1	0	1	0	0	0	Characteristic	Stable
Geranium sanguineum L.	1	1	0	0	1	0	0	1	1	0	0	0	1	0	0	0	Characteristic	Increased occurence
Geranium sylvaticum L.	1	0	0	0	0	0	0	0	0	0	0	0	0	0	0	0	Derived	New
Geum rivale L.	1	0	1	0	1	1	1	1	1	1	1	0	1	1	1	1	Derived	Stable
Geum urbanum L.	0	1	1	1	0	0	0	1	0	0	0	0	0	0	0	0	Derived	New
Glechoma hederacea L.	0	1	1	0	1	0	0	0	1	0	0	0	1	0	0	0	Derived	Stable
Helianthemum nummularium (L.) Mill.	1	1	0	0	1	0	1	1	1	1	1	1	1	1	1	1	Characteristic	Decreased occurence
Helictotrichon pratense (L.) Pilg.	1	1	1	0	1	1	1	1	1	1	1	1	1	1	1	1	Characteristic	Stable
Helictotrichon pubescens (Huds.) Schult. & Schult.f.	1	1	0	1	1	1	1	1	1	0	0	0	0	0	1	1	Derived	Increased occurence
Hepatica nobilis Mill.	1	0	0	0	0	0	0	0	1	0	0	0	0	1	0	0	Derived	Stable
Heracleum sphondylium ssp. sibiricum L.	1	1	1	1	0	0	0	0	0	0	0	0	0	0	0	0	Derived	New
Herniaria glabra L.	0	1	1	0	1	1	0	0	1	0	0	0	1	0	1	0	Derived	Stable
Hieracium umbellatum L.	1	1	1	1	1	0	0	1	1	0	0	1	1	1	1	1	Derived	Stable
Hypericum maculatum Crantz	0	0	0	0	1	0	1	0	0	0	0	0	0	0	0	0	Derived	New
Hypericum perforatum L.	1	1	1	1	1	1	0	1	1	1	0	0	0	1	1	0	Characteristic	Increased occurence
Hypochaeris maculata L.	1	0	0	0	0	0	1	0	1	0	0	0	0	1	0	1	Characteristic	Stable
Impatiens parviflora DC.	0	0	1	0	0	0	0	0	0	0	0	0	0	0	0	0	Derived	New
Inula salicina L.	0	0	0	0	0	0	1	1	0	0	0	0	0	0	0	0	Characteristic	New
Jacobaea vulgaris Gaertn.	1	1	0	0	1	1	0	1	0	1	0	0	0	0	1	1	Characteristic	Increased occurence
Juncus articulatus L.	0	0	1	0	0	0	0	0	0	0	0	0	0	0	0	0	Derived	New
Knautia arvensis (L.) Coult.	1	1	0	1	1	0	0	1	1	1	0	0	1	1	1	1	Characteristic	Stable
Koeleria glauca (Spreng.) DC.	0	0	0	0	1	1	0	0	0	0	0	0	0	0	0	0	Derived	New
Koeleria pyramidata (Lam.) P.Beauv.	1	1	0	0	1	0	1	0	1	1	1	1	1	1	1	1	Derived	Decreased occurence
Lamium album L.	0	1	1	1	1	1	0	1	1	1	1	0	0	0	0	0	Derived	Increased occurence
Lamium galeobdolon (L.) L.	1	0	0	0	1	0	0	0	0	0	0	0	0	0	0	0	Derived	New
Lamium purpureum L.	0	0	0	0	0	0	0	0	0	0	0	0	0	1	0	0	Derived	Locally extinct
Lappula squarrosa (Retz.) Dumort.	0	0	0	0	0	0	0	0	0	0	1	0	0	0	0	0	Derived	Locally extinct
Lapsana communis L.	1	1	1	0	0	0	0	0	0	0	0	0	0	0	0	0	Derived	New
Lathyrus palustris L.	0	0	0	0	0	1	0	0	0	0	0	0	0	0	0	0	Derived	New
Lathyrus pratensis L.	1	1	1	1	1	1	0	1	1	1	0	1	1	1	1	1	Characteristic	Stable
Leontodon hispidus L.	0	0	0	0	0	0	0	1	0	0	0	0	0	0	0	0	Characteristic	New
Leonurus cardiaca L.	0	0	0	0	0	0	0	1	0	0	0	0	0	0	0	0	Derived	New
Leucanthemum vulgare (Vaill.) Lam.	1	1	1	1	1	1	1	1	1	1	0	1	1	1	1	1	Characteristic	Stable
Leymus arenarius (L.) Hochst.	0	1	0	0	0	0	0	0	0	0	0	0	0	0	0	0	Derived	New
Linaria vulgaris Mill.	1	1	1	1	1	1	1	1	1	1	1	1	0	1	1	1	Derived	Stable
Linum catharticum L.	0	0	0	0	1	1	1	0	1	1	0	1	0	1	1	1	Characteristic	Decreased occurence
Lolium perenne L.	0	1	1	0	0	0	0	0	0	0	0	0	0	0	0	0	Derived	New
Lotus corniculatus L.	1	1	1	1	1	1	1	1	1	1	1	1	1	1	1	1	Characteristic	Stable
Luzula campestris (L.) DC.	0	0	0	0	0	0	1	1	1	0	0	1	1	1	1	1	Characteristic	Decreased occurence
Luzula multiflora (Ehrh.) Lej.	0	0	0	0	0	1	0	0	1	0	0	1	0	0	1	0	Derived	Decreased occurence
Luzula pallescens Sw.	0	0	0	0	0	0	0	0	0	0	0	1	0	0	0	0	Derived	Locally extinct
Matricaria discoidea DC.	0	0	1	0	0	1	0	1	0	0	1	0	1	0	1	0	Derived	Stable
Medicago falcata L.	0	0	0	0	0	1	0	0	0	0	0	0	0	0	0	0	Derived	New
Medicago lupulina L.	1	1	1	1	1	0	1	1	0	0	0	0	0	1	0	0	Characteristic	Increased occurence
Melampyrum nemorosum Baumg.	1	0	0	0	1	0	1	1	1	0	0	0	0	0	0	0	Derived	Increased occurence
Melica nutans L.	1	0	0	0	0	0	0	0	0	0	0	0	0	0	0	0	Derived	New
Melilotus albus Medik.	0	0	1	0	0	1	0	1	0	0	1	0	1	0	0	0	Derived	Stable
Melilotus officinalis (L.) Pall.	0	1	1	0	0	0	0	0	0	0	1	0	0	0	0	0	Derived	Stable
Mentha arvensis L.	0	0	0	0	0	0	0	0	0	1	0	0	1	0	0	0	Derived	Locally extinct
Moehringia trinervia (L.) Clairv.	0	0	0	0	0	0	0	0	1	0	0	0	1	0	1	0	Derived	Locally extinct
Myosotis arvensis (L.) Hill	1	1	1	1	1	1	1	1	1	1	0	0	0	0	0	1	Derived	Increased occurence
Myosotis ramosissima Rochel	1	0	0	0	1	1	0	1	1	0	0	1	0	0	0	0	Derived	Increased occurence
Myosotis stricta Link ex Roem. & Schult.	1	0	1	0	0	1	0	0	1	0	0	0	0	0	0	0	Derived	Increased occurence
Myosurus minimus L.	0	1	0	0	0	0	0	0	0	0	0	0	1	0	0	0	Derived	Stable
Neottia nidus-avis (L.) Rich.	0	0	0	0	0	0	0	1	0	0	0	0	0	0	0	0	Derived	New
Origanum vulgare L.	0	0	0	0	0	0	0	0	0	0	0	0	0	1	0	0	Derived	Locally extinct
Ornithogalum umbellatum L.	0	0	1	0	0	0	0	0	0	0	0	0	0	0	0	0	Derived	New
Orobanche alsatica Kirschl.	0	0	0	0	0	0	0	1	0	0	0	0	0	0	0	0	Derived	New
Papaver dubium L.	0	0	1	0	0	0	0	0	0	0	0	0	0	0	0	0	Derived	New
Papaver somniferum L.	0	0	1	0	0	0	0	0	0	0	0	0	0	0	0	0	Derived	New
Parnassia palustris L.	0	0	0	0	0	0	0	0	0	0	0	0	0	0	0	1	Derived	Locally extinct
Pastinaca sativa L.	0	1	1	0	0	1	0	1	1	0	0	0	0	0	0	0	Derived	Increased occurence
Persicaria lapathifolia (L.) Delarbre	0	0	1	0	0	0	0	0	0	0	0	0	0	0	0	0	Derived	New
Petasites spurius (Retz.) Rchb.	0	0	0	0	0	0	0	1	0	0	0	0	0	0	0	0	Derived	New
Phalaris arundinacea L.	0	1	0	0	0	1	0	0	0	0	0	0	0	0	0	0	Derived	New
Phleum bertolonii DC.	1	1	1	1	1	1	1	1	1	1	1	1	1	1	1	0	Characteristic	Stable
Phleum phleoides (L.) H.Karst.	1	1	1	0	1	1	1	1	1	1	0	1	1	0	1	1	Characteristic	Stable
Phleum pratense L.	1	0	1	1	1	1	1	1	1	1	1	1	1	1	1	1	Derived	Stable
Phragmites australis (Cav.) Trin. ex Steud.	0	1	0	0	0	0	0	0	0	0	0	0	0	0	0	0	Derived	New
Pilosella lactucella (Wallr.) P.D.Sell & C.West	0	0	0	0	0	0	0	0	1	0	0	1	1	1	1	1	Characteristic	Locally extinct
Pilosella officinarum Vaill.	1	1	1	0	1	0	1	1	1	1	1	1	1	1	1	1	Characteristic	Decreased occurence
Pimpinella major (L.) Huds.	1	1	0	1	1	0	0	1	0	0	0	0	0	0	0	0	Derived	New
Pimpinella saxifraga L.	1	1	1	1	1	1	0	1	1	0	1	1	1	0	1	1	Characteristic	Stable
Plantago lanceolata L.	1	1	1	0	1	1	1	1	1	1	1	0	0	0	1	1	Characteristic	Increased occurence
Plantago major L.	0	1	1	0	1	1	0	0	1	0	1	0	1	0	1	0	Derived	Stable
Plantago media L.	1	1	1	0	1	1	1	1	1	1	1	1	1	1	1	1	Characteristic	Stable
Poa alpina L.	0	0	0	0	1	0	0	0	1	0	0	0	1	0	1	1	Characteristic	Decreased occurence
Poa angustifolia L.	1	1	1	1	1	1	0	1	0	0	0	0	0	0	0	0	Characteristic	New
Poa annua L.	0	0	1	1	1	0	0	0	0	0	0	0	0	1	1	0	Derived	Stable
Poa compressa L.	1	1	1	0	1	1	0	1	0	1	1	1	1	0	1	1	Derived	Stable
Poa nemoralis L.	0	0	0	0	0	0	0	0	0	0	0	0	1	0	0	0	Derived	Locally extinct
Poa palustris L.	0	0	0	0	1	0	0	0	1	0	1	0	1	0	0	0	Derived	Decreased occurence
Poa pratensis L.	1	1	1	0	1	0	0	1	1	0	1	0	1	0	0	1	Derived	Stable
Poa trivialis L.	0	0	0	0	0	0	0	0	0	0	0	0	1	0	0	0	Derived	Locally extinct
Polygala amarella Crantz	1	0	0	0	0	0	0	0	1	1	1	0	0	0	0	1	Characteristic	Decreased occurence
Polygala comosa Schkuhr	1	0	0	0	0	0	0	0	1	1	1	0	0	0	1	1	Characteristic	Decreased occurence
Polygonum arenastrum Boreau	0	0	1	0	0	0	0	0	0	0	0	0	0	0	0	0	Derived	New
Potentilla anserina L.	0	1	1	1	1	1	1	0	1	0	0	0	1	0	0	0	Derived	Increased occurence
Potentilla argentea L.	1	1	1	1	1	1	0	1	1	0	0	0	1	0	0	1	Derived	Increased occurence
Potentilla crantzii (Crantz) Beck ex Fritsch	1	1	0	0	1	0	1	0	1	1	1	1	1	1	1	1	Characteristic	Decreased occurence
Potentilla erecta (L.) Raeusch.	0	0	0	0	1	0	1	0	1	0	0	0	1	1	1	0	Characteristic	Decreased occurence
Potentilla norvegica L.	0	0	1	0	0	0	0	0	0	0	0	0	0	0	0	0	Derived	New
Potentilla reptans L.	1	1	1	0	1	1	1	1	0	0	0	0	0	0	0	0	Characteristic	New
Potentilla tabernaemontani Asch.	1	0	0	0	1	1	0	1	0	0	0	0	1	0	0	1	Characteristic	Increased occurence
Potentilla thuringiaca Bernh.	0	1	0	0	0	0	0	0	0	0	0	0	0	0	0	0	Derived	New
Primula veris L.	1	1	0	1	1	1	1	1	1	0	0	1	0	0	0	0	Characteristic	Increased occurence
Prunella vulgaris L.	0	0	0	0	0	0	0	0	1	0	0	0	1	1	1	1	Characteristic	Locally extinct
Ranunculus acris L.	1	1	1	1	1	1	0	1	1	1	1	1	1	1	0	1	Derived	Stable
Ranunculus auricomus L.	0	0	0	0	0	1	1	0	0	0	0	0	1	0	0	1	Derived	Stable
Ranunculus bulbosus L.	0	1	0	0	0	0	1	0	0	0	0	0	0	0	0	0	Characteristic	New
Ranunculus polyanthemos L.	1	1	1	1	1	1	1	1	1	1	0	1	1	1	1	1	Characteristic	Stable
Ranunculus repens L.	1	0	1	0	1	0	1	0	1	0	1	0	1	0	0	1	Derived	Stable
Rhinanthus minor L.	0	0	0	0	1	1	0	0	1	0	0	0	1	1	1	1	Derived	Decreased occurence
Rumex acetosa L.	1	0	0	1	1	1	1	1	1	1	1	0	1	1	1	1	Derived	Stable
Rumex acetosella L.	0	0	1	0	0	0	0	0	0	0	0	1	0	0	0	0	Characteristic	Stable
Rumex crispus L.	1	0	1	0	1	0	0	0	1	1	1	0	0	0	0	1	Derived	Stable
Rumex longifolius DC.	0	1	1	0	0	0	0	0	0	0	1	0	0	0	0	0	Derived	Stable
Sagina nodosa (L.) Fenzl	0	0	1	1	1	0	0	1	1	1	1	0	1	1	1	1	Characteristic	Decreased occurence
Sagina procumbens L.	0	0	0	0	0	0	0	0	0	0	0	0	0	1	1	0	Derived	Locally extinct
Saponaria officinalis L.	0	0	1	0	0	0	0	0	0	0	0	0	0	0	0	0	Derived	New
Saxifraga adscendens L.	0	0	0	0	0	0	0	0	1	0	0	0	0	0	0	0	Derived	Locally extinct
Saxifraga granulata L.	0	0	0	0	0	1	1	0	0	0	0	0	0	0	0	0	Derived	New
Saxifraga tridactylites L.	0	1	1	0	1	0	0	0	1	1	1	1	1	0	1	1	Characteristic	Decreased occurence
Scorzoneroides autumnalis (L.) Moench	1	1	1	0	1	1	1	1	1	1	1	1	1	1	1	1	Characteristic	Stable
Scrophularia nodosa L.	0	0	1	0	1	1	0	1	0	0	0	0	0	0	0	1	Derived	Increased occurence
Sedum acre L.	1	1	1	1	1	1	1	1	1	1	1	1	1	1	1	1	Characteristic	Stable
Sedum album L.	0	0	0	0	1	0	0	0	0	0	0	0	1	0	0	0	Characteristic	Stable
Sedum telephium L.	0	0	0	0	1	0	0	0	0	0	0	0	1	0	0	0	Derived	Stable
Senecio integrifolius Hook.	1	1	0	0	1	1	1	1	1	0	0	1	1	0	0	1	Derived	Increased occurence
Senecio viscosus L.	0	1	0	0	0	1	0	0	0	0	0	0	0	0	0	0	Derived	New
Senecio vulgaris L.	0	1	1	1	0	0	0	0	1	0	1	0	0	0	0	0	Derived	Stable
Seseli libanotis (L.) W.D.J.Koch	0	1	0	0	1	1	0	1	1	0	0	0	0	0	1	1	Characteristic	Stable
Sesleria caerulea (L.) Ard.	1	1	0	0	1	1	0	1	1	1	1	1	0	0	0	0	Characteristic	Stable
Silene dioica (L.) Clairv.	0	0	0	0	0	1	0	0	0	0	0	0	0	0	0	0	Derived	New
Silene flos-cuculi (L.) Greuter & Burdet	0	0	0	0	0	1	0	0	0	0	0	0	0	0	0	0	Derived	New
Silene latifolia ssp. alba (Mill.) Greuter & Burdet	1	1	1	1	1	1	0	1	0	0	0	0	0	0	0	0	Derived	New
Silene nutans L.	1	1	1	1	1	1	0	1	1	0	1	0	0	0	0	1	Derived	Increased occurence
Silene viscaria (L.) Jess.	1	0	0	0	1	0	0	0	0	0	0	0	0	0	0	0	Derived	New
Silene vulgaris (Moench) Garcke	0	1	1	1	1	1	0	1	1	0	1	0	1	0	0	1	Derived	Increased occurence
Sinapis arvensis L.	0	0	0	1	0	0	0	0	0	0	0	0	0	0	0	0	Derived	New
Sisymbrium supinum L.	0	0	0	0	0	0	0	0	1	1	1	0	0	0	0	0	Characteristic	Locally extinct
Solanum dulcamara L.	0	1	1	0	0	0	0	0	0	0	0	0	0	0	0	0	Derived	New
Solidago virgaurea L.	0	1	0	1	1	0	0	1	1	0	1	0	0	1	1	1	Characteristic	Stable
Sonchus arvensis L.	0	1	0	0	1	0	0	0	0	0	0	0	0	0	0	0	Derived	New
Sonchus oleraceus (L.) L.	0	0	1	0	0	0	0	0	0	0	0	0	0	0	0	0	Derived	New
Stachys sylvatica L.	0	0	1	0	0	0	0	0	0	0	0	0	0	0	0	0	Derived	New
Stellaria graminea L.	1	1	1	1	1	1	1	1	1	1	1	1	1	1	1	1	Characteristic	Stable
Stellaria media (L.) Vill.	0	0	1	0	0	0	0	0	0	0	0	0	0	0	0	0	Derived	New
Stellaria palustris Ehrh. ex Retz.	0	1	1	0	0	0	0	0	0	0	0	0	0	1	0	0	Derived	Stable
Tanacetum vulgare L.	0	1	1	0	1	1	0	1	1	1	0	0	0	0	0	0	Derived	Increased occurence
Thalictrum aquilegiifolium L.	0	0	0	0	1	0	0	0	0	0	0	0	0	0	0	0	Derived	New
Thalictrum flavum L.	0	0	0	0	1	1	0	1	1	0	0	0	0	0	0	0	Derived	Increased occurence
Thalictrum minus L.	0	1	0	0	0	0	0	0	0	0	0	0	0	0	0	0	Derived	New
Thalictrum simplex L.	1	0	1	0	1	0	1	0	1	0	0	0	1	0	1	1	Derived	Stable
Thlaspi arvense L.	0	0	1	1	0	0	0	0	0	0	0	0	0	0	0	0	Derived	New
Thymus serpyllum L.	1	1	0	0	1	1	1	0	1	1	1	1	1	1	1	1	Characteristic	Decreased occurence
Tragopogon pratensis L.	1	1	1	0	1	1	1	1	0	0	0	0	0	0	0	0	Derived	New
Trifolium arvense L.	0	0	1	1	0	0	0	0	0	0	0	0	0	0	0	0	Derived	New
Trifolium hybridum L.	0	1	1	1	0	0	0	1	1	0	0	0	0	0	0	0	Derived	Increased occurence
Trifolium medium L.	1	1	1	1	0	0	0	1	0	0	0	0	0	0	0	1	Derived	Increased occurence
Trifolium montanum L.	0	0	0	0	0	0	1	0	1	0	0	1	1	0	1	1	Characteristic	Decreased occurence
Trifolium pratense L.	1	1	1	1	1	1	1	1	1	1	1	1	1	1	1	1	Characteristic	Stable
Trifolium repens L.	1	1	1	1	1	1	1	1	1	1	1	1	1	1	1	1	Characteristic	Stable
Tripleurospermum inodorum (L.) Sch.Bip.	1	0	1	1	1	1	1	1	0	0	0	0	1	0	0	0	Derived	Increased occurence
Triticum aestivum L.	0	0	1	0	0	0	0	0	0	0	0	0	0	0	0	0	Derived	New
Trollius europaeus L.	0	0	0	0	0	0	1	0	0	0	0	0	0	0	0	0	Derived	New
Turritis glabra L.	0	0	0	0	1	1	0	1	0	0	0	0	0	0	0	0	Derived	New
Tussilago farfara L.	1	1	1	1	0	1	0	1	1	0	0	0	0	0	0	0	Derived	Increased occurence
Urtica dioica L.	1	1	1	1	1	1	0	1	1	1	1	0	1	0	0	1	Derived	Increased occurence
Urtica urens L.	0	0	0	0	0	0	0	0	0	0	1	0	0	0	0	0	Derived	Locally extinct
Valeriana officinalis L.	0	0	0	1	0	0	0	0	0	0	0	0	1	0	0	0	Derived	Increased occurence
Valerianella locusta (L.) Laterr.	0	1	1	0	1	1	1	1	0	0	0	0	0	0	0	0	Derived	New
Verbascum nigrum L.	1	0	1	0	1	1	0	1	1	1	0	0	0	0	0	0	Derived	Increased occurence
Verbascum thapsus L.	1	1	1	1	0	0	0	0	1	1	0	0	0	0	0	0	Derived	Increased occurence
Veronica arvensis L.	1	0	0	1	0	0	1	1	1	0	0	0	0	0	0	0	Derived	Increased occurence
Veronica beccabunga L.	0	0	0	0	0	1	0	0	0	0	0	0	0	0	0	0	Derived	New
Veronica chamaedrys L.	1	1	1	1	1	1	1	1	1	1	1	0	0	1	1	1	Characteristic	Increased occurence
Veronica longifolia L.	1	1	1	0	1	1	0	0	0	0	0	0	1	0	0	0	Derived	Increased occurence
Veronica officinalis L.	1	0	0	0	0	0	1	0	1	0	0	0	0	0	0	0	Characteristic	Stable
Veronica serpyllifolia L.	0	0	0	0	0	0	0	0	1	0	1	0	0	0	1	0	Derived	Locally extinct
Veronica spicata L.	1	1	1	1	1	1	1	1	1	1	1	1	1	1	1	1	Characteristic	Stable
Veronica verna L.	0	0	0	0	0	0	0	0	1	0	0	0	0	0	0	0	Derived	Locally extinct
Vicia cassubica L.	0	0	1	0	0	0	0	0	0	0	0	0	0	0	0	0	Derived	New
Vicia cracca L.	1	1	1	1	1	1	1	1	1	1	1	1	1	1	1	1	Characteristic	Stable
Vicia hirsuta (L.) Gray	1	0	1	1	0	0	0	1	0	0	0	0	1	0	0	0	Derived	Increased occurence
Vicia sativa ssp. nigra L.	0	0	0	0	0	0	0	0	0	0	0	1	0	0	0	0	Derived	Locally extinct
Vicia sepium L.	1	0	1	0	0	1	1	1	0	0	0	1	0	0	0	0	Derived	Increased occurence
Vicia tetrasperma (L.) Schreb.	0	1	1	1	1	1	0	0	0	0	0	0	0	0	0	0	Derived	New
Vicia villosa Roth	1	0	1	1	0	0	0	0	0	0	0	0	0	0	0	0	Derived	New
Vincetoxicum hirundinaria Medik.	0	0	0	0	0	0	1	0	0	0	0	0	0	0	0	0	Characteristic	New
Viola arvensis Murray	1	0	1	1	1	0	0	0	1	0	0	0	0	0	0	0	Derived	Increased occurence
Viola canina L.	0	0	0	0	0	0	0	0	0	1	0	0	1	1	0	1	Derived	Locally extinct
Viola collina Besser	0	0	0	0	0	0	0	0	1	0	0	0	0	0	0	0	Derived	Locally extinct
Viola mirabilis L.	1	0	0	0	0	0	0	0	0	0	0	0	0	0	0	0	Derived	New
Viola rupestris F.W.Schmidt	1	0	0	0	0	0	1	0	1	1	1	1	1	1	1	1	Characteristic	Decreased occurence
Viola tricolor L.	0	0	0	0	1	1	0	0	0	0	0	0	0	0	0	0	Derived	New
